# Supplementary material
Source: HighWire-hosted journal article supplement (https://jnm.snmjournals.org/highwire/filestream/94969/field_highwire_adjunct_files/0/167320_Supplemental_Data.pdf)
Supplement: 167320_Supplemental_Data.pdf [file 167320_Supplemental_Data.pdf]

Supplemental Table 1. Baseline hemoglobin parameters between pCR and non-pCR

A. All patients (n = 84)

|                        | non-pCR (n = 68) |           | pCR (n = 16) |           | <i>p</i> -value |
|------------------------|------------------|-----------|--------------|-----------|-----------------|
|                        | Median           | 95% CI    | Median       | 95% CI    |                 |
| O <sub>2</sub> Hb (μM) | 25.9             | 24.1–29.6 | 24.3         | 20.1–38.7 | 0.5             |
| HHb (μM)               | 7.8              | 6.8–8.7   | 7.5          | 5.5–10.8  | 0.4             |
| tHb (μM)               | 33.5             | 31.2–38.3 | 31.1         | 25.7–49.8 | 0.4             |
| stO <sub>2</sub> (%)   | 77.2             | 75.9–78.5 | 77.7         | 76.2–79.6 | 0.5             |

B. Luminal breast cancer patients\* (n = 48)

|                        | non-pCR (n = 42) |           | pCR (n = 6) |           | <i>p</i> -value |
|------------------------|------------------|-----------|-------------|-----------|-----------------|
|                        | Median           | 95% CI    | Median      | 95% CI    |                 |
| O <sub>2</sub> Hb (μM) | 25               | 22.9–27.4 | 29.6        | 14.9–50.9 | 0.9             |
| HHb (μM)               | 7.6              | 6.5–8.7   | 8.6         | 4.9–15.1  | 0.9             |
| tHb (μM)               | 32.4             | 30.1–34.9 | 38.3        | 20.0–66.0 | 0.8             |
| stO <sub>2</sub> (%)   | 77               | 74.8–78.4 | 77.1        | 74.6–78.6 | 0.9             |

C. Triple-negative breast cancer patients (n = 26)

|                        | non-pCR (n = 22) |           | pCR (n = 4) |        | <i>p</i> -value |
|------------------------|------------------|-----------|-------------|--------|-----------------|
|                        | Median           | 95% CI    | Median      | 95% CI |                 |
| O <sub>2</sub> Hb (μM) | 30.9             | 24.1–38.8 | 22.7        | -      | 0.2             |
| HHb (μM)               | 8.5              | 6.7–12.7  | 7.5         | -      | 0.2             |
| tHb (μM)               | 38.8             | 31.3–51.9 | 30.1        | -      | 0.2             |
| stO <sub>2</sub> (%)   | 77.8             | 75.7–79.4 | 78.1        | -      | 0.5             |

D. HER2-positive breast cancer patients (n = 18)

|                       | non-pCR (n = 8) |           | pCR (n = 10) |           | <i>p</i> -value |
|-----------------------|-----------------|-----------|--------------|-----------|-----------------|
|                       | Median          | 95% CI    | Median       | 95% CI    |                 |
| HbO <sub>2</sub> (μM) | 25              | 15.3–43.0 | 34           | 19.7–42.3 | 0.5             |
| HHb (μM)              | 25              | 15.3–43.0 | 34           | 19.7–42.3 | 0.5             |
| tHb (μM)              | 32.1            | 20.4–57.7 | 42.5         | 26.4–54.0 | 0.5             |
| stO <sub>2</sub> (%)  | 75.9            | 72.2–80.4 | 78.2         | 76.2–79.6 | 0.5             |

\* Including eight patients with luminal-HER2 subtype

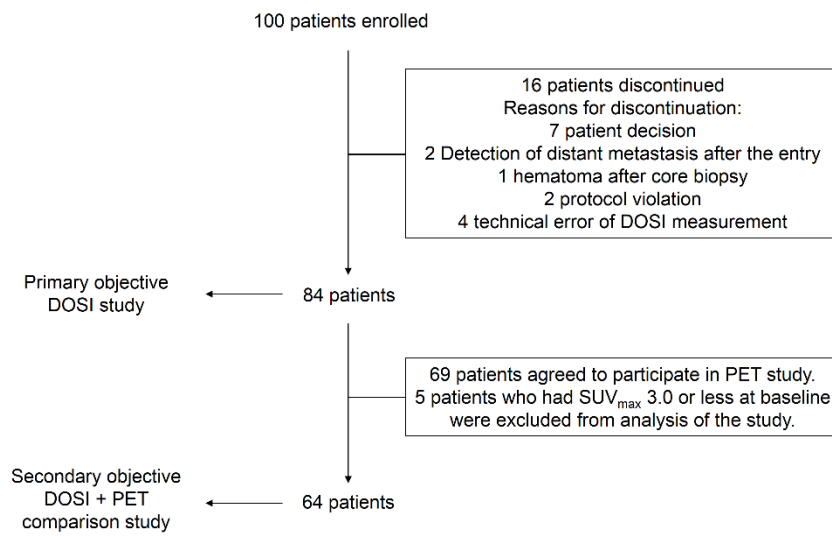

Supplemental Figure 1.
